# Supplementary material for: Synthesis and in vitro bone cell activity of analogues of the cyclohexapeptide dianthin G
Source: Royal Society of Chemistry journal article supplement (doi:10.1039/c6ob00983b), 2016-01-01
Supplement: c6ob00983b1.pdf [file c6ob00983b1.pdf]

## Synthesis and *in vitro* bone cell activity of analogues of the cyclohexapeptide Dianthin G

Zaid Amso,<sup>a,b</sup> Renata Kowalczyk,<sup>a</sup> Young-Eun Park,<sup>c</sup> Maureen Watson,<sup>c</sup> Jian-Ming Lin,<sup>c</sup> David  
S. Musson,<sup>c</sup> Jillian Cornish,<sup>c</sup> and Margaret A. Brimble<sup>\*a,b</sup>

---

<sup>a.</sup> *School of Chemical Sciences, The University of Auckland, 23 Symonds St, Auckland 1142, New Zealand. E-mail: m.brimble@auckland.ac.nz; Phone: (+64) 9 373 7599 ext. 88259*

<sup>b.</sup> *Maurice Wilkins Centre for Molecular Biodiscovery, The University of Auckland, Private Bag 92019, Auckland 1142, New Zealand.*

<sup>c.</sup> *School of Medicine, The University of Auckland, Private Bag 92019, Auckland 1010, New Zealand.*

### Supporting information

## General methods

### Materials

All reagents were acquired as reagent grade and used without further purification. Solvents for RP-HPLC were purchased as HPLC grade and used without further purification. 6-Chloro-1-hydroxybenzotriazole (6-Cl-HOBt) was purchased from Aapptec (Louisville, Kentucky). *O*-(Benzotriazol-1-yl)-*N,N,N',N'*-tetramethyluronium hexafluorophosphate (HBTU), 2-(7-aza-1*H*-benzotriazole-1-yl)-1,1,3,3-tetramethyluronium hexafluorophosphate (HATU), 2-chlorotrityl chloride resin, 4-(hydroxymethyl)phenoxyacetic acid (HMP linker), di-*tert*-butyl dicarbonate (Boc<sub>2</sub>O), Fmoc-allylglycine-OH (Fmoc-Agl), Fmoc-Pro-OH, Fmoc-Leu-OH, Fmoc-Thr(*t*Bu)-OH, Fmoc-Phe-OH, and Fmoc-Gly-OH were purchased from GL Biochem (Shanghai, China). *N,N*-Dimethylformamide (DMF) (AR grade), and acetonitrile (CH<sub>3</sub>CN) [high-performance liquid chromatography (HPLC) grade] were purchased from Scharlau (Barcelona, Spain). *N,N'*-Diisopropylethylamine (*i*Pr<sub>2</sub>EtN), *N,N'*-diisopropylcarbodiimide (DIC), 2-mercaptoethanol, 1,8-diazabicyclo[5.4.0]undec-7-ene (DBU), 2,4,6-trimethylpyridine (*sym*-collidine), Hoveyda-Grubbs' II catalyst, 2,2,2-trifluoroethanol (TFE), dimethylsulfate (DMS), 2-nitrobenzenesulfonyl chloride (*o*-NBS-Cl), formic acid, 1-methyl-2-pyrrolidinone (NMP), and piperidine were purchased from Sigma–Aldrich (Sydney, Australia). Dichloromethane (CH<sub>2</sub>Cl<sub>2</sub>) was purchased from ECP Limited (Auckland, New Zealand). Triisopropylsilane (*i*Pr<sub>3</sub>SiH) was purchased from Alfa Aesar (Lankashire, U.K). Dimethyl sulfoxide-d<sub>6</sub> (DMSO-d<sub>6</sub>) was purchased from Cambridge Isotope Laboratories (Massachusetts, USA). Trifluoroacetic acid (TFA) was purchased from Halocarbon (New Jersey, USA). Dimethyl sulfoxide (DMSO) was purchased from Romil Ltd (Cambridge, UK). Fmoc-Gly-O-CH<sub>2</sub>-Phi-OCH<sub>2</sub>-CH<sub>2</sub>-COOH (Fmoc-Gly-HMPP) was purchased from PolyPeptide Laboratories Group (Strasbourg, France). Aminomethyl polystyrene resin was purchased from Rapp Polymere (Tuebingen, Germany).

### HPLC, MS and NMR

Analytical RP-HPLC spectra were performed on a Dionex (California, USA) Ultimate 3000 System equipped with a two-channel UV detector using an analytical column

(XTerra® MS C<sub>18</sub> column, 4.6 mm x 150 mm, 5 μm) and a linear gradient of 5% to 75%B over 35 mins (*ca.* 2%B per minute) at a flow rate of 1 mL min<sup>-1</sup>. The solvent system used was A (0.1% trifluoroacetic acid in H<sub>2</sub>O) and B (0.1% trifluoroacetic acid in CH<sub>3</sub>CN). Peptide masses were confirmed by a Bruker micrOTOF-Q II mass spectrometer (Bremen, Germany) or a Hewlett Packard (HP) 1100 series mass spectrometer (California, USA) using direct flow injection at 0.3 mL min<sup>-1</sup> into an ESI source in the positive mode.

Peptides were purified using a Waters (Massachusetts, USA) S600E system using a semi-preparative column (Waters XTerra® C<sub>18</sub>, 300 mm x 19 mm, 10 μm) at a flow rate of 10 mL min<sup>-1</sup> and eluted using a one-step slow gradient protocol with detection at 210 nm.<sup>1</sup> Fractions were collected, analysed by analytical RP-HPLC or ESI-MS, pooled and lyophilised three times from 10 mM aq HCl.<sup>2</sup>

Nuclear magnetic resonance spectra were recorded on a Bruker AVANCE 600 spectrometer (Bremen, Germany) using DMSO-d<sub>6</sub> as a solvent. Assignments were made with the aid of HSQC, TOCSY, and NOESY experiments.

## **Peptide synthesis**

### **Loading of the C-terminal amino acid to the resin**

For peptides **1-5**:

A solution of Fmoc-Gly-O-CH<sub>2</sub>-phi-OCH<sub>2</sub>-CH<sub>2</sub>-COOH (190.2 mg, 0.4 mmol) and DIC (62 μL, 0.4 mmol) in CH<sub>2</sub>Cl<sub>2</sub>/DMF (*v/v*; 2:1, 3 mL) was added to pre-swollen (CH<sub>2</sub>Cl<sub>2</sub>, 3 mL, 20 min) aminomethyl polystyrene resin (220.0 mg, 0.2 mmol) and the mixture gently agitated for 5 h, at room temperature, filtered and washed with DMF (4 x 3 mL). A negative Kaiser test<sup>3</sup> confirmed the coupling.

For peptide **6**:

A solution of Fmoc-Gly-OH (119.0 mg, 0.4 mmol) and *i*Pr<sub>2</sub>EtN (70 μL, 0.4 mmol) in CH<sub>2</sub>Cl<sub>2</sub>/DMF (*v/v*; 2:1, 3 mL) was added to pre-swollen (CH<sub>2</sub>Cl<sub>2</sub>, 3 mL, 20 min) 2-ClTrtCl resin (150.0 mg, 0.2 mmol) and the mixture was shaken for 1 h at room temperature, filtered, and washed with DMF (4 x 3 mL).

For peptides **7, 8, 9, and 10**:

A solution of HMP linker (109.3 mg, 0.6 mmol) and DIC (93 μL, 0.6 mmol) in CH<sub>2</sub>Cl<sub>2</sub>/DMF (*v/v*; 2:1, 3 mL) was added to pre-swollen (CH<sub>2</sub>Cl<sub>2</sub>, 3 mL, 20 min)

aminomethyl polystyrene resin (220.0 mg, 0.2 mmol) and the mixture was shaken for 5 h at room temperature, filtered, and washed with DMF (4 x 3 mL). A negative Kaiser test<sup>3</sup> confirmed the coupling.

For peptides **7**, **8**, and **9**, a mixture of Fmoc-allylglycine (202.4 mg, 0.6 mmol), DIC (93  $\mu$ L, 0.6 mmol) and DMAP (2.44 mg, 0.02 mmol) in DMF (3 mL) was then added to the resin and the reaction mixture was shaken for 1 h at room temperature. This procedure was repeated once with fresh reagents. For peptide **10**, a mixture of the Fmoc-Gly-OH (178.4 mg, 0.6 mmol), DIC (93  $\mu$ L, 0.6 mmol) and DMAP (2.44 mg, 0.02 mmol) in DMF (3 mL) was then added to the resin and the reaction mixture was shaken for 1 h at room temperature (repeated once).

### **Elongation of the peptide sequence**

Extension of the C-terminal amino acid on the resin was performed at room temperature using manual Fmoc-SPPS. Deprotection of the Fmoc group was accomplished using 20% v/v piperidine/DMF (3 mL) for 5 min twice with consecutive DMF washes after each addition. A solution of Fmoc-amino acid (0.8 mmol), HATU (281.4 mg, 0.74 mmol), *i*Pr<sub>2</sub>EtN (278.7  $\mu$ L, 1.6 mmol) in DMF (3 mL) was then added to peptidyl-resin and the mixture was shaken at room temperature for 45 min, then filtered and washed with DMF (4 x 3 mL).

Following on-resin elongation of the linear precursor of RCM peptides (peptidyl-resin **18**, **19**, and **22**), Boc<sub>2</sub>O (436.5 mg, 2.0 mmol) in DMF (3 mL) was added to the peptidyl-resin and the mixture was shaken at room temperature for 2 h, filtered, and washed with DMF (4 X 3 mL), CH<sub>2</sub>Cl<sub>2</sub> (4 x 3 mL), and dried under vacuum.

### **Peptide cleavage and isolation**

The resulting peptides were released from the resin with concomitant removal of the threonine side chain protecting group by treatment with TFA/*i*Pr<sub>3</sub>SiH/H<sub>2</sub>O (v/v/v; 95:2.5:2.5, 5 mL) at room temperature for 3 h. The resin was removed by filtration, washed with TFA (2 x 3 mL) and the combined filtrates were concentrated, re-suspended with H<sub>2</sub>O/CH<sub>3</sub>CN (v/v; 1:1) and lyophilised.

### Peptide cyclisation

Cyclisation was carried out in solution using the pseudo-high dilution conditions described by Brimble *et al.*<sup>4</sup> Peptide **2** is used here as an example of the synthetic procedure followed for macrolactamisation. To a stirring solution of *i*Pr<sub>2</sub>EtN (139.4 μL, 0.8 mmol) in CH<sub>2</sub>Cl<sub>2</sub> (150 mL) was added a mixture of the linear peptide (105.0 mg, 0.16 mmol, 0.8 mM), HBTU (182.0 mg, 0.48 mmol), and 6-Cl-HOBt (81.40 mg, 0.48 mmol) in CH<sub>2</sub>Cl<sub>2</sub>/DMF (v/v; 9:1, 50 mL) dropwise at a rate of 2.0 mL h<sup>-1</sup>. After complete addition of the reagents, the reaction mixture was concentrated under reduced pressure, diluted with H<sub>2</sub>O (15 mL) and lyophilised. The crude peptide was purified by RP-HPLC to yield peptide **2** as a white fluffy solid (49.0 mg, 38% overall yield, 98% purity).

## A. Dianthin G (1)

Dianthin G (**1**) was synthesised using manual Fmoc-SPPS on an aminomethyl polystyrene resin (0.2 mmol), which following the cleavage conditions in the general procedure afforded the crude linear precursor as a white solid (110 mg, 85% yield). The crude linear precursor (110 mg, 0.17 mmol) was cyclised using solution-phase macrolactamisation as outlined in the general methods section. RP-HPLC purification afforded peptide **1** as a white fluffy solid (65.4 mg, 52% overall yield, 99% purity);  $R_t$  20.40 min;  $m/z$  (HR-MS) 629.3663 ( $[M+H]^+$  requires for  $C_{32}H_{49}N_6O_7$ : 629.3584).

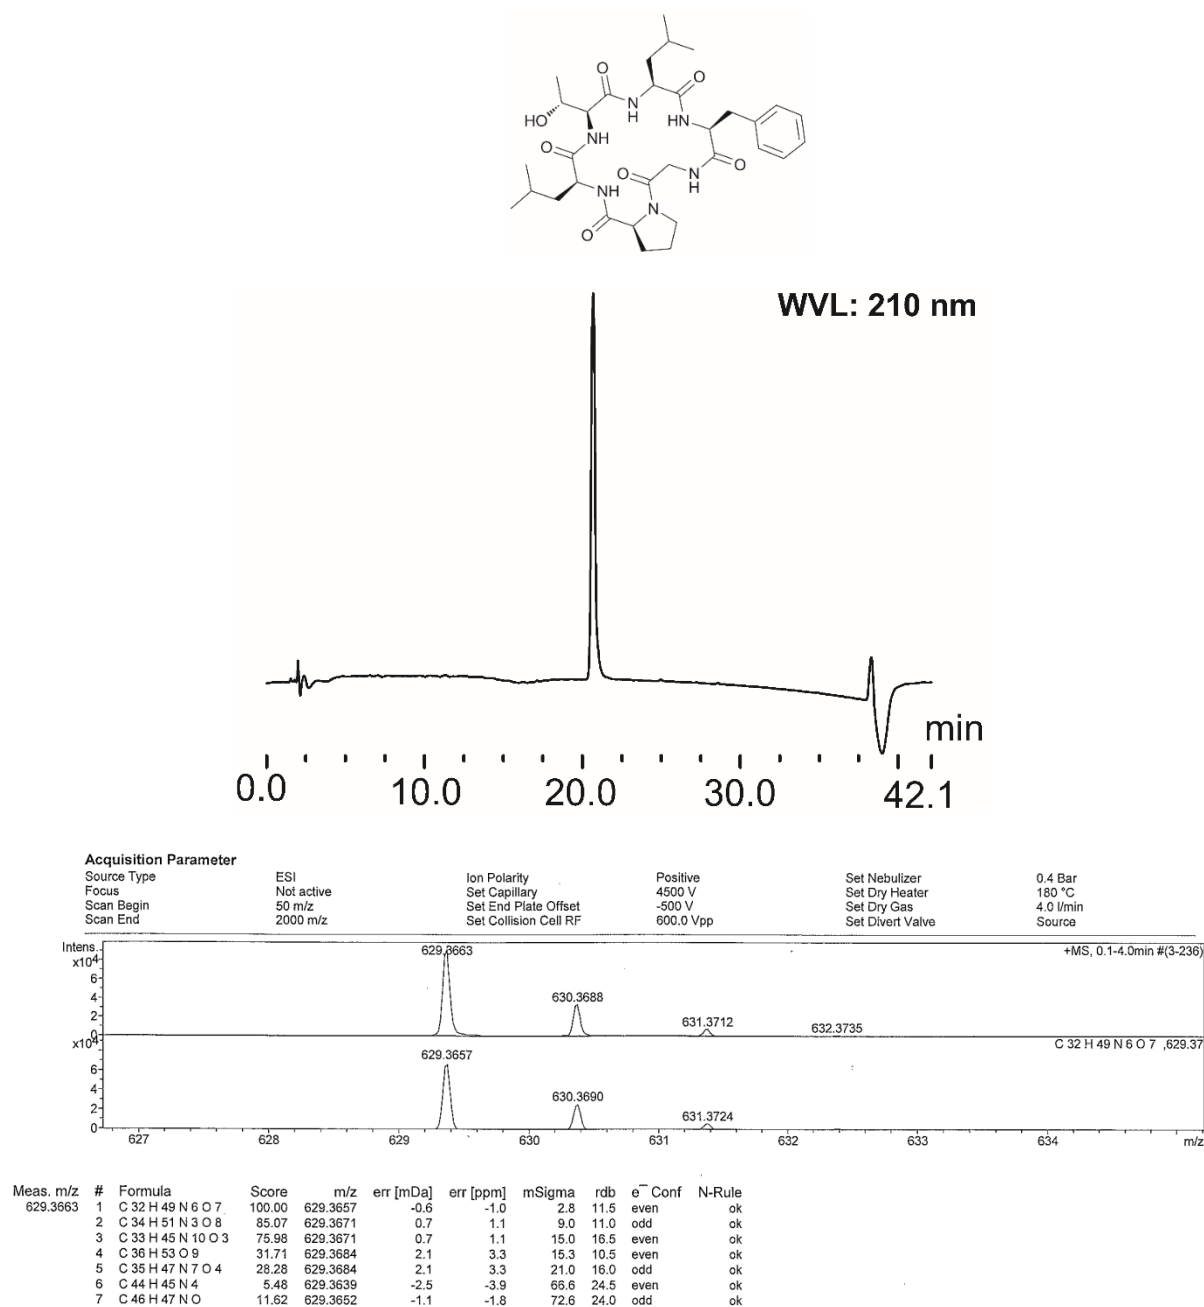

**Figure S1.** Analytical RP-HPLC and HR-MS data of dianthin G (**1**).

## B. Peptide 2

Peptide **2** was synthesised using manual Fmoc-SPPS on an aminomethyl polystyrene resin (0.2 mmol), which following the cleavage conditions in the general procedure afforded the crude linear precursor (105 mg, 79% yield). The crude linear precursor (105 mg, 0.16 mmol) was cyclised using solution-phase macrolactamisation as outlined in the general methods section. RP-HPLC purification afforded peptide **2** as a white fluffy solid (49.0 mg, 38% overall yield, 98% purity);  $R_t$  21.56 min;  $m/z$  (HR-MS) 643.3815 ( $[M+H]^+$  requires for  $C_{33}H_{51}N_6O_7$ : 643.3741).

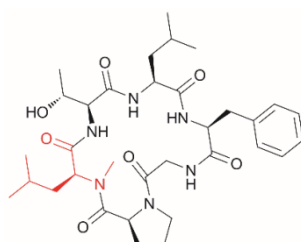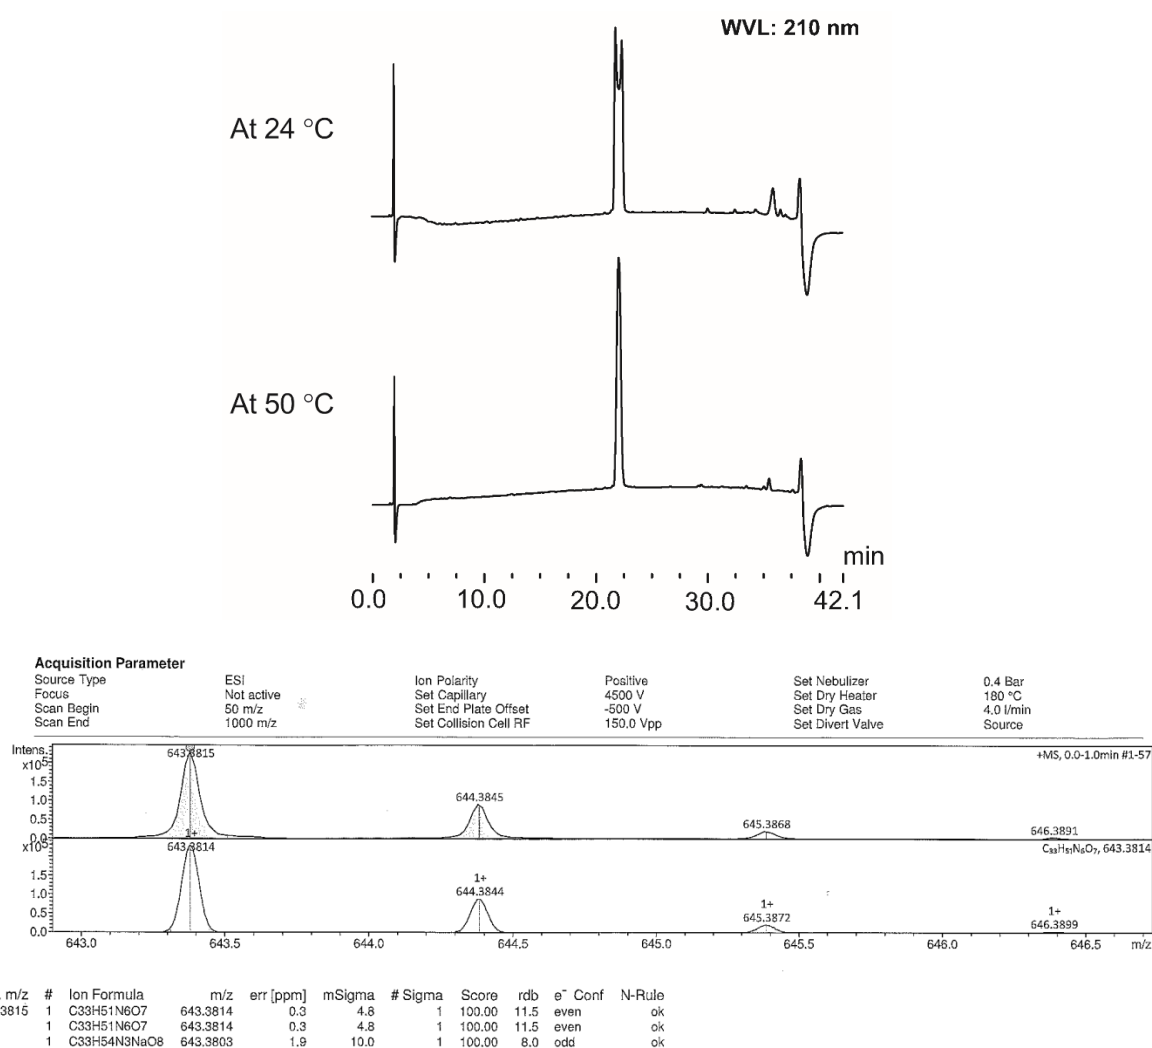

Figure S2. Analytical RP-HPLC and HR-MS data of peptide **2**.

### C. Peptide 3

Peptide **3** was synthesised using manual Fmoc-SPPS on an aminomethyl polystyrene resin (0.2 mmol), which following the cleavage conditions in the general procedure afforded the crude linear precursor (67.4 mg, 51% yield). The crude linear precursor (67.4 mg, 0.1 mmol) was cyclised using solution-phase macrolactamisation as outlined in the general methods section. RP-HPLC purification afforded peptide **3** as a white fluffy solid (28.3 mg, 22% overall yield, 97% purity);  $R_t$  23.17 min;  $m/z$  (HR-MS) 643.3820 ( $[M+H]^+$  requires for  $C_{33}H_{51}N_6O_7$ : 643.3741).

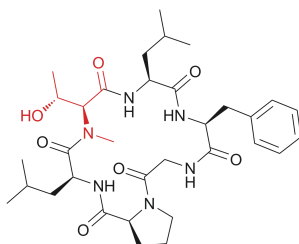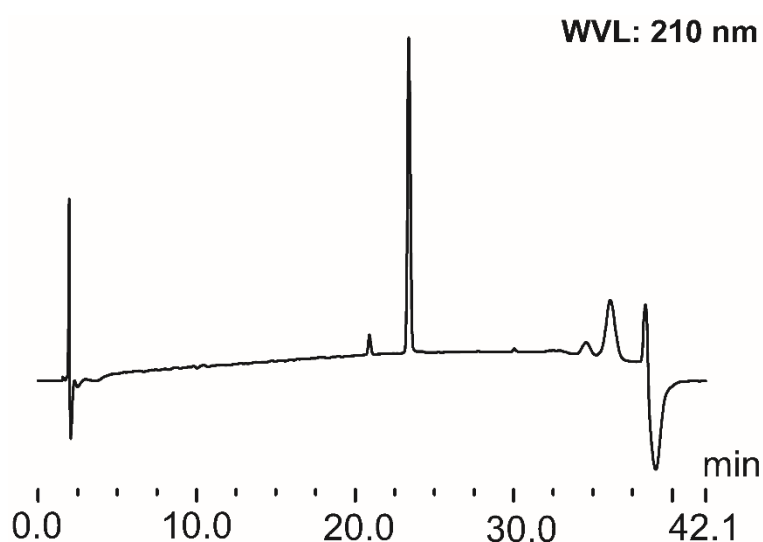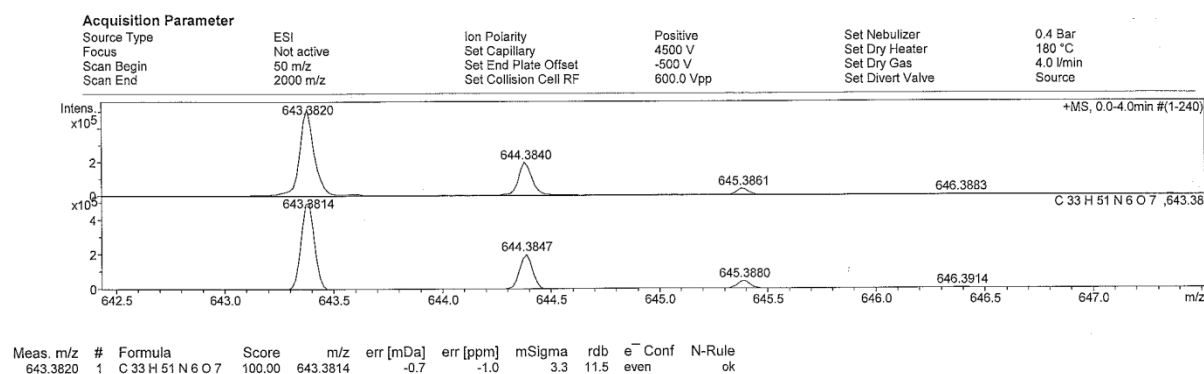

Figure S3. Analytical RP-HPLC and HR-MS data of peptide **3**.





## E. Peptide 5

Peptide **5** was synthesised using manual Fmoc-SPPS on an aminomethyl polystyrene resin (0.2 mmol), which following the cleavage conditions in the general procedure afforded the crude linear precursor (84.6 mg, 64% yield). The crude linear precursor (84.6 mg, 0.13 mmol) was cyclised using solution-phase macrolactamisation as outlined in the general methods section. RP-HPLC purification afforded peptide **5** as a white fluffy solid (55.3 mg, 43% overall yield, 98% purity);  $R_t$  20.80 min;  $m/z$  (HR-MS) 643.3815 ( $[M+H]^+$  requires for  $C_{33}H_{51}N_6O_7$ : 643.3741).

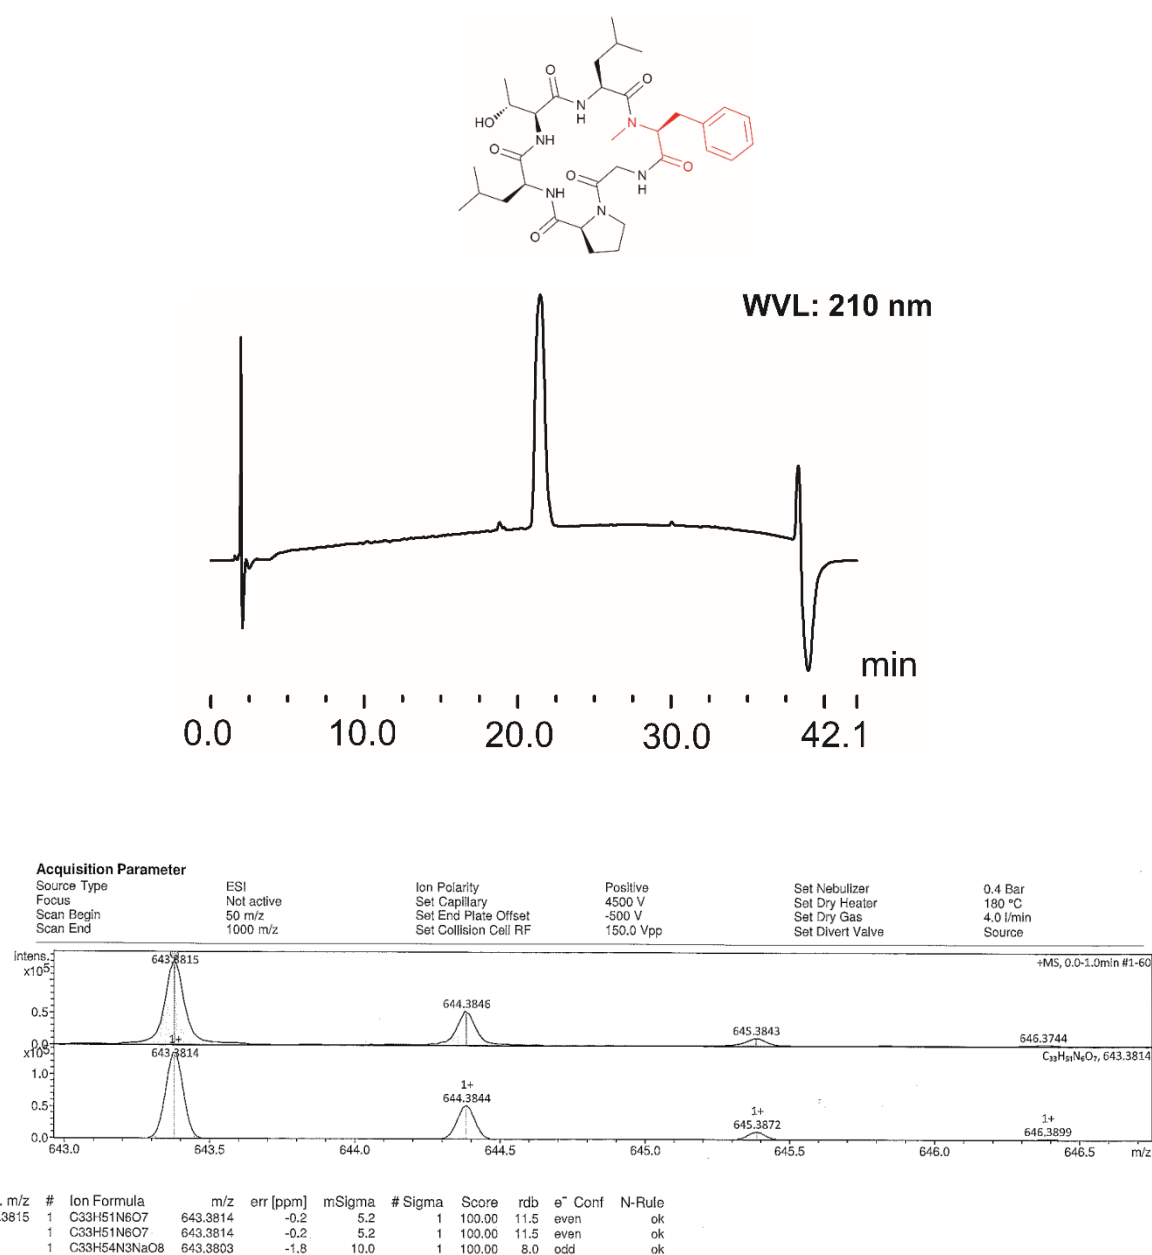

**Figure S5.** Analytical RP-HPLC and HR-MS data of peptide **5**.

## F. Peptide 6

Peptide **6** was synthesised using manual Fmoc-SPPS on a 2-chlorotrityl chloride resin (0.2 mmol), which following the cleavage conditions in the general procedure afforded the crude linear precursor (80.6 mg, 61% yield). The crude linear precursor (80.6 mg, 0.12 mmol) was cyclised using solution-phase macrolactamisation as outlined in the general methods section. RP-HPLC purification afforded peptide **6** as a white fluffy solid (50.1 mg, 39% overall yield, 98% purity);  $R_t$  22.09 min;  $m/z$  (HR-MS) 643.3803 ( $[M+H]^+$  requires for  $C_{33}H_{51}N_6O_7$ : 643.3741).

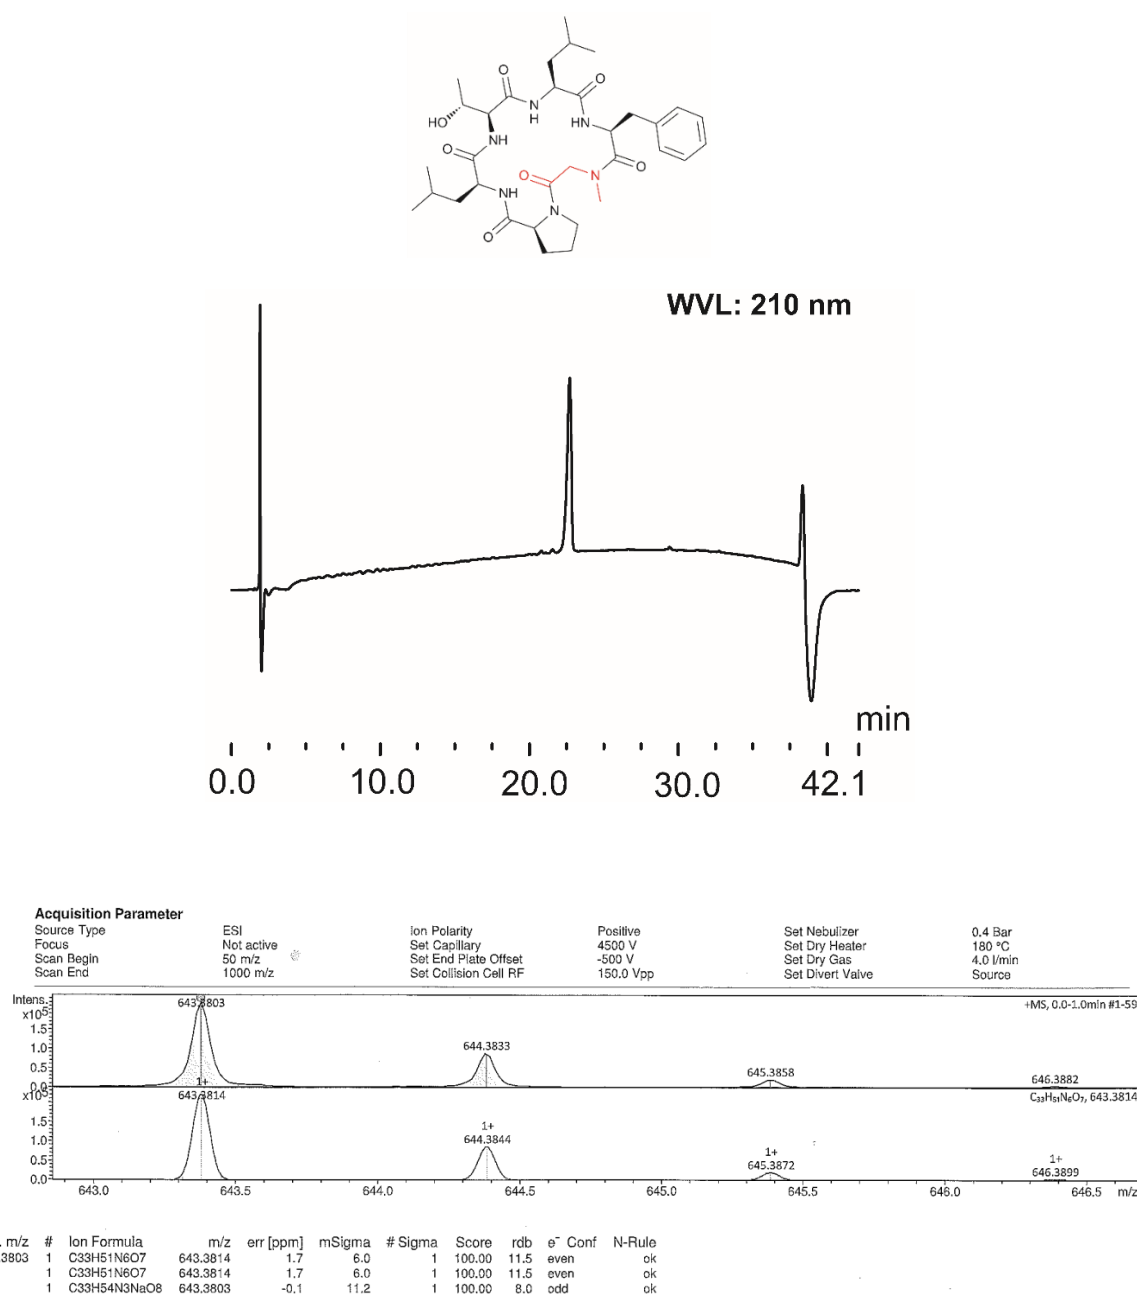

Figure S6. Analytical RP-HPLC and HR-MS data of peptide **6**.

## G. Peptide 7

The peptidyl-resin **18** was synthesised using manual Fmoc-SPPS on an aminomethyl polystyrene resin (0.2 mmol) and the peptidyl-resin (67.2 mg,  $32.5 \times 10^{-3}$  mmol) was subjected to microwave-assisted ring closing metathesis as outlined in the general methods section. Following cleavage from the resin, RP-HPLC purification afforded peptide **7** as a white fluffy solid (4.84 mg, 16% yield from resin-bound peptide **18**, 99% purity);  $R_t$  18.75 min;  $m/z$  (HR-MS) 756.4262 ( $[M+H]^+$  requires for  $C_{38}H_{58}N_7O_9$ : 756.4218).

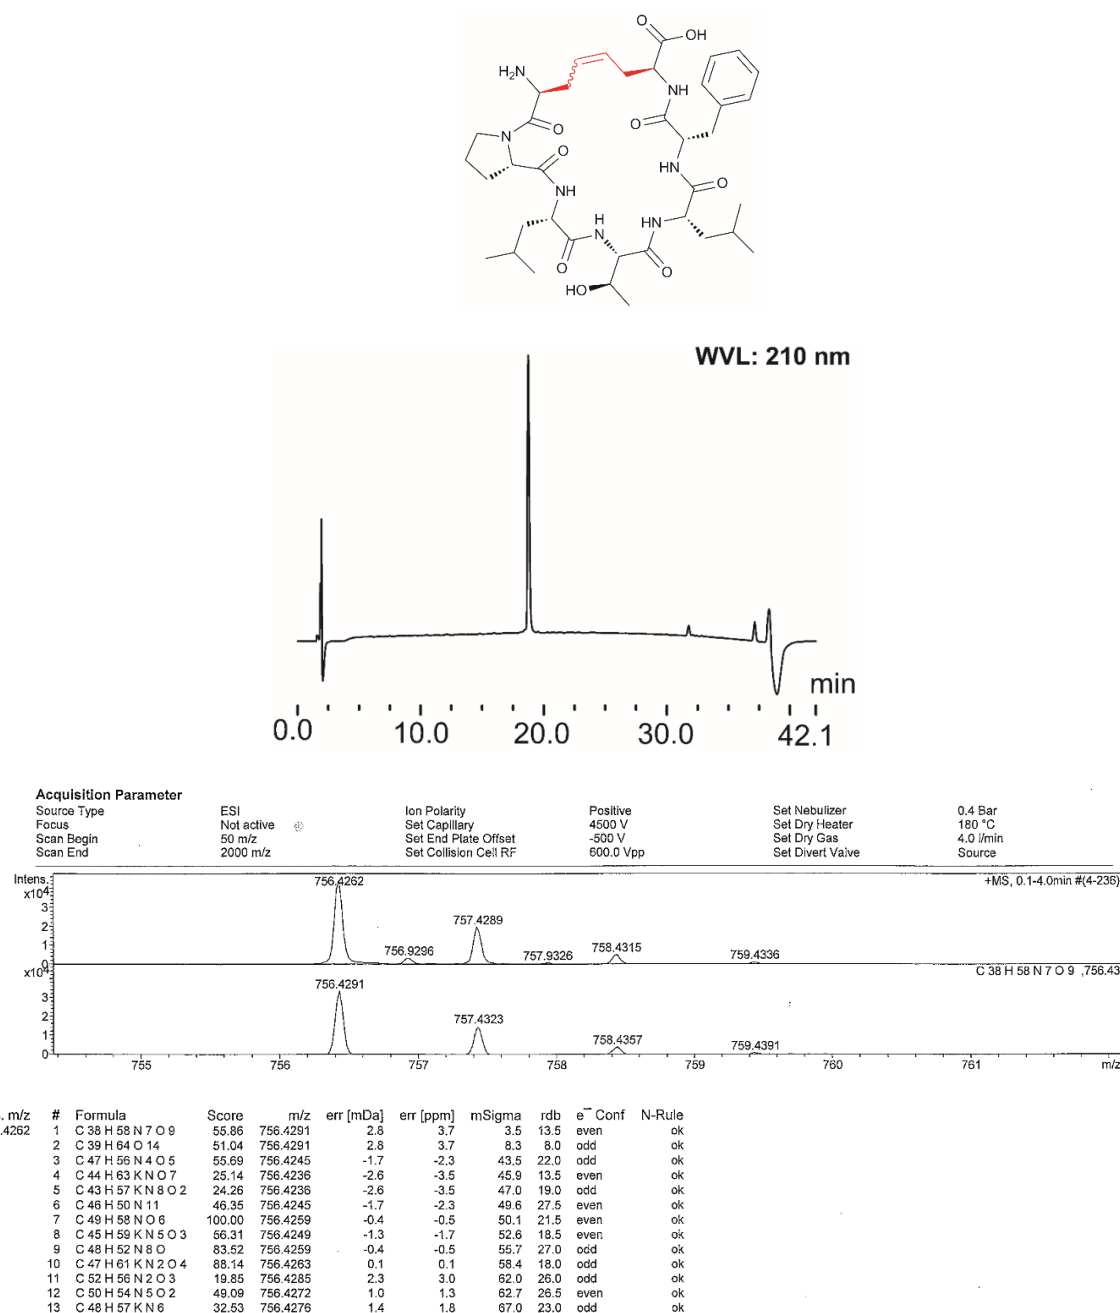

Figure S7. Analytical RP-HPLC and HR-MS data of peptide 7.

## H. Peptide 8

The peptidyl-resin **19** was synthesised using manual Fmoc-SPPS on an aminomethyl polystyrene resin (0.2 mmol) and the peptidyl-resin (66.5 mg,  $32.5 \times 10^{-3}$  mmol) was subjected to microwave-assisted ring closing metathesis as outlined in the general methods section. Following cleavage from the resin, RP-HPLC purification afforded peptide **8** as a white fluffy solid (6.55 mg, 25% yield from resin-bound peptide **19**, 98% purity);  $R_t$  17.6 min;  $m/z$  (HR-MS) 655.3810 ( $[M+H]^+$  requires for  $C_{34}H_{51}N_6O_7$ : 655.4218).

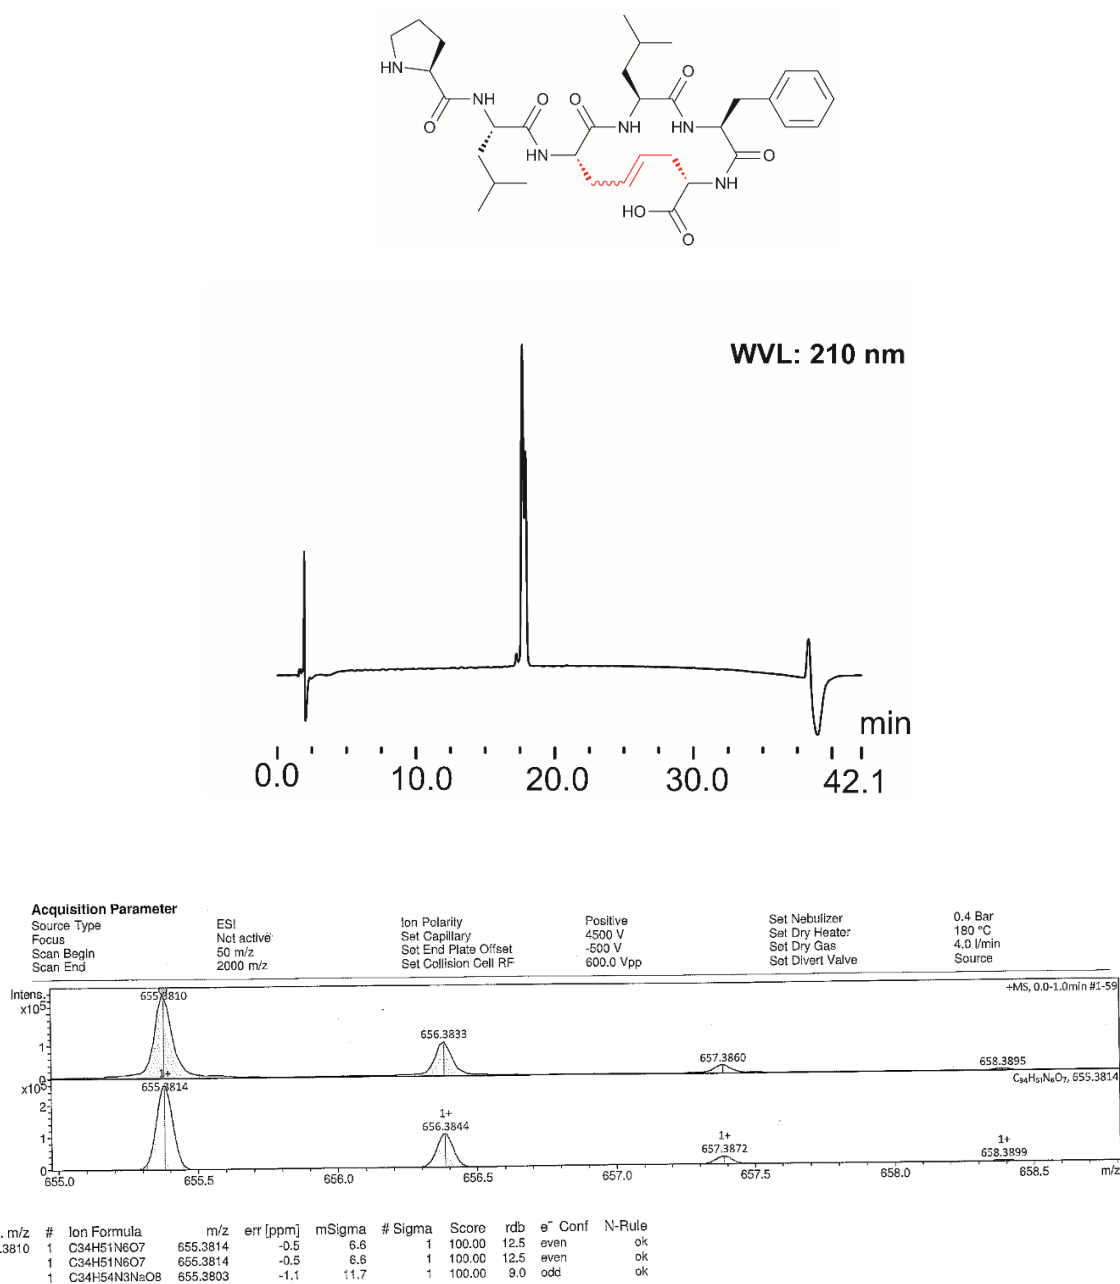

Figure S8. Analytical RP-HPLC and HR-MS data of peptide **8**.

## I. Peptide 9

Peptide **8** (6.0 mg, 9.2  $\mu\text{mol}$ ) was cyclised in solution, as outlined in the general methods, to yield the crude peptide **9**. RP-HPLC purification afforded peptide **9** as a white fluffy solid (4.07 mg, 68% yield from peptide **8** and 16% overall yield, 99% purity);  $R_t$  21.80 min;  $m/z$  (HR-MS) 637.3706 ( $[\text{M}+\text{H}]^+$  requires for  $\text{C}_{34}\text{H}_{49}\text{N}_6\text{O}_6$ : 637.3605).

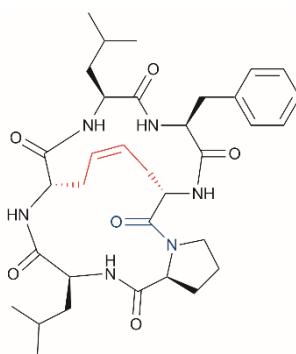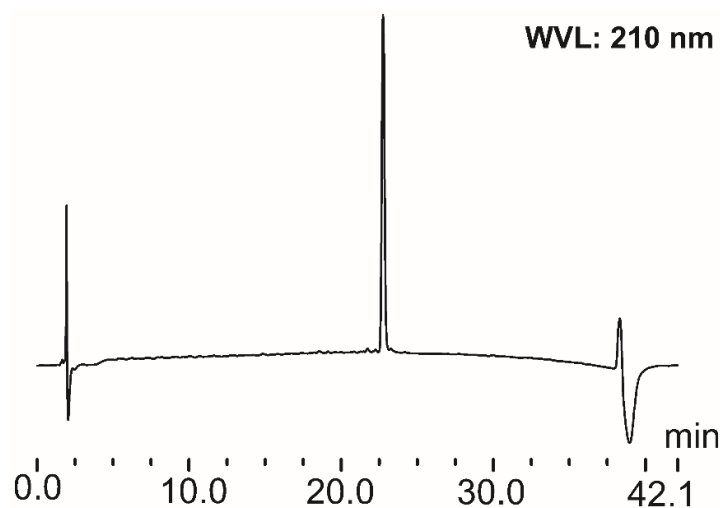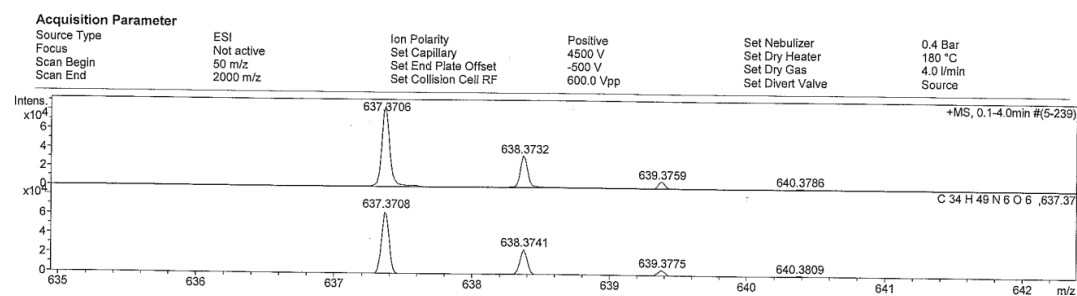

| Meas. m/z | #  | Formula                                                         | Score  | m/z      | err [mDa] | err [ppm] | mSigma | rdb  | e <sup>-</sup> Conf | N-Rule |
|-----------|----|-----------------------------------------------------------------|--------|----------|-----------|-----------|--------|------|---------------------|--------|
| 637.3706  | 1  | C <sub>34</sub> H <sub>49</sub> N <sub>6</sub> O <sub>6</sub>   | 100.00 | 637.3708 | 0.2       | 0.4       | 0.7    | 13.5 | even                | ok     |
|           | 2  | C <sub>32</sub> H <sub>47</sub> N <sub>9</sub> O <sub>5</sub>   | 58.25  | 637.3695 | -1.1      | -1.7      | 5.9    | 14.0 | odd                 | ok     |
|           | 3  | C <sub>36</sub> H <sub>51</sub> N <sub>3</sub> O <sub>7</sub>   | 42.85  | 637.3722 | 1.6       | 2.5       | 6.8    | 13.0 | odd                 | ok     |
|           | 4  | C <sub>33</sub> H <sub>43</sub> N <sub>13</sub> O               | 86.99  | 637.3709 | 0.2       | 0.4       | 8.9    | 19.0 | odd                 | ok     |
|           | 5  | C <sub>33</sub> H <sub>53</sub> N <sub>2</sub> O <sub>10</sub>  | 54.21  | 637.3695 | -1.1      | -1.7      | 10.1   | 3.5  | even                | ok     |
|           | 6  | C <sub>35</sub> H <sub>45</sub> N <sub>10</sub> O <sub>2</sub>  | 38.18  | 637.3721 | 1.6       | 2.5       | 13.2   | 18.5 | even                | ok     |
|           | 7  | C <sub>33</sub> H <sub>48</sub> N <sub>11</sub>                 | 19.40  | 637.3726 | 2.0       | 3.1       | 30.1   | 15.0 | odd                 | ok     |
|           | 8  | C <sub>32</sub> H <sub>52</sub> N <sub>7</sub> O <sub>4</sub>   | 45.02  | 637.3712 | 0.7       | 1.0       | 30.3   | 10.0 | odd                 | ok     |
|           | 9  | C <sub>34</sub> H <sub>54</sub> N <sub>4</sub> O <sub>5</sub>   | 18.22  | 637.3726 | 2.0       | 3.1       | 32.5   | 9.5  | even                | ok     |
|           | 10 | C <sub>33</sub> H <sub>58</sub> K <sub>1</sub> O <sub>9</sub>   | 40.20  | 637.3712 | 0.7       | 1.0       | 34.7   | 4.5  | even                | ok     |
|           | 11 | C <sub>43</sub> H <sub>52</sub> K <sub>1</sub> N <sub>1</sub> O | 5.69   | 637.3680 | -2.5      | -4.0      | 57.7   | 18.0 | odd                 | ok     |
|           | 12 | C <sub>48</sub> H <sub>47</sub> N                               | 15.22  | 637.3703 | -0.3      | -0.4      | 71.3   | 26.0 | odd                 | ok     |

Figure S9. Analytical RP-HPLC and HR-MS data of peptide **9**.

## J. Peptide 10

The peptidyl-resin **22** was synthesised using manual Fmoc-SPPS on an aminomethyl polystyrene resin (0.2 mmol) and the peptidyl-resin (56.2 mg,  $32.5 \times 10^{-3}$  mmol) was subjected to microwave-assisted ring closing metathesis as outlined in the general methods section. Following cleavage from the resin, RP-HPLC purification afforded peptide **10** as a white fluffy solid (4.52 mg, 20% yield from resin-bound peptide **22**, 99% purity);  $R_t$  13.00 min;  $m/z$  (HR-MS) 565.3346 ( $[M+H]^+$  requires for  $C_{27}H_{45}N_6O_7$ : 565.3271).

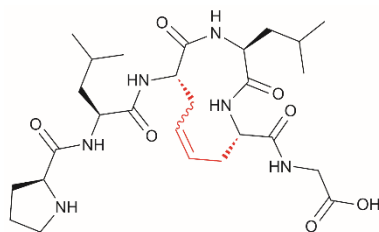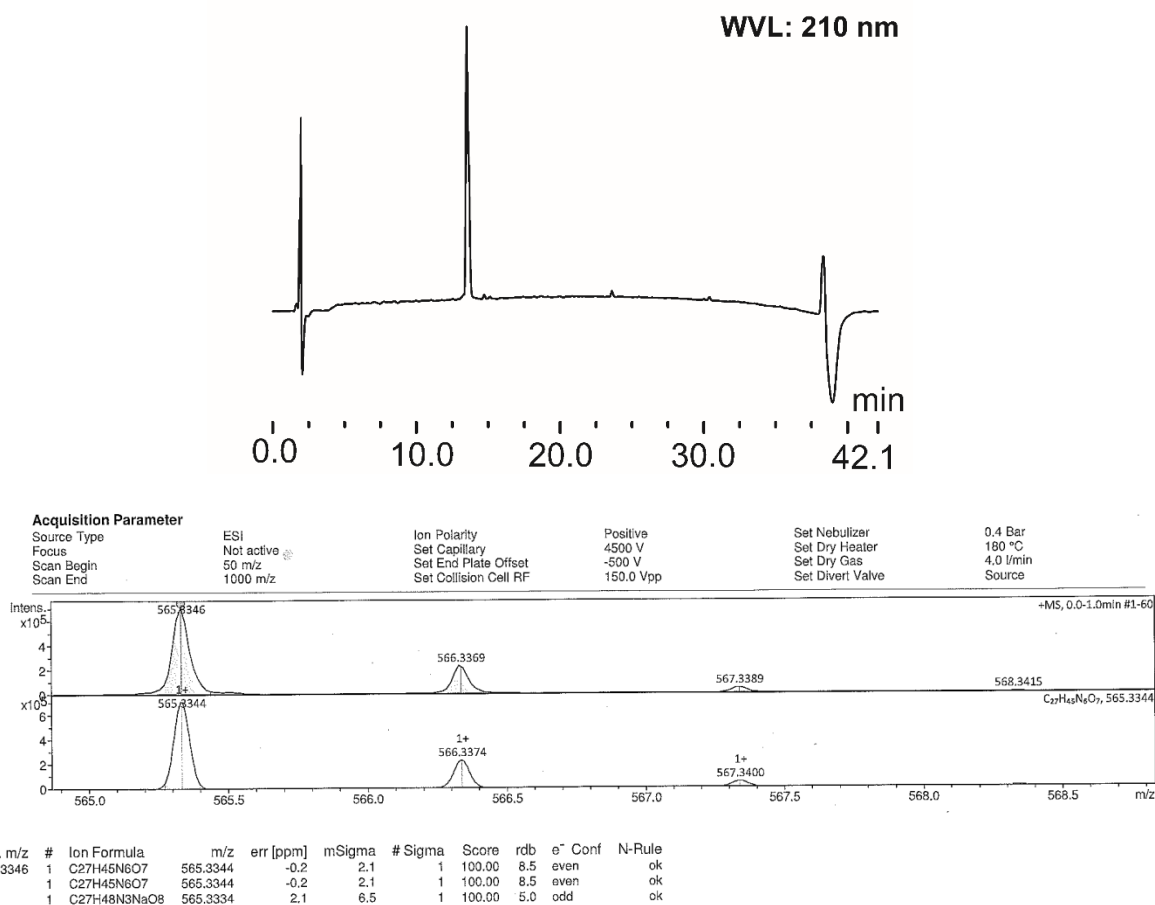

**Figure S10.** Analytical RP-HPLC and HR-MS data of peptide **10**.

## K. Peptide 23

Peptide **23** was synthesised using manual Fmoc-SPPS on an aminomethyl polystyrene resin (0.2 mmol), which following the cleavage conditions in the general procedure afforded the crude linear precursor as a white solid (77.0 mg, 65% yield). The crude linear precursor (77.0 mg, 0.13 mmol) was cyclised using solution-phase macrolactamisation as outlined in the general methods section. RP-HPLC purification afforded peptide **23** as a white fluffy solid (45.98 mg, 40% overall yield, 96% purity);  $R_t$  21.20 min;  $m/z$  (HR-MS) 575.3547 ( $[M+H]^+$  requires for  $C_{29}H_{47}N_6O_6$ : 575.3479).

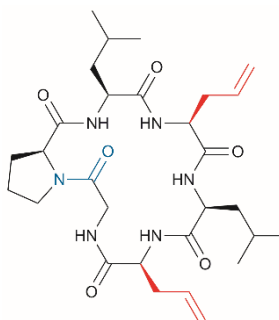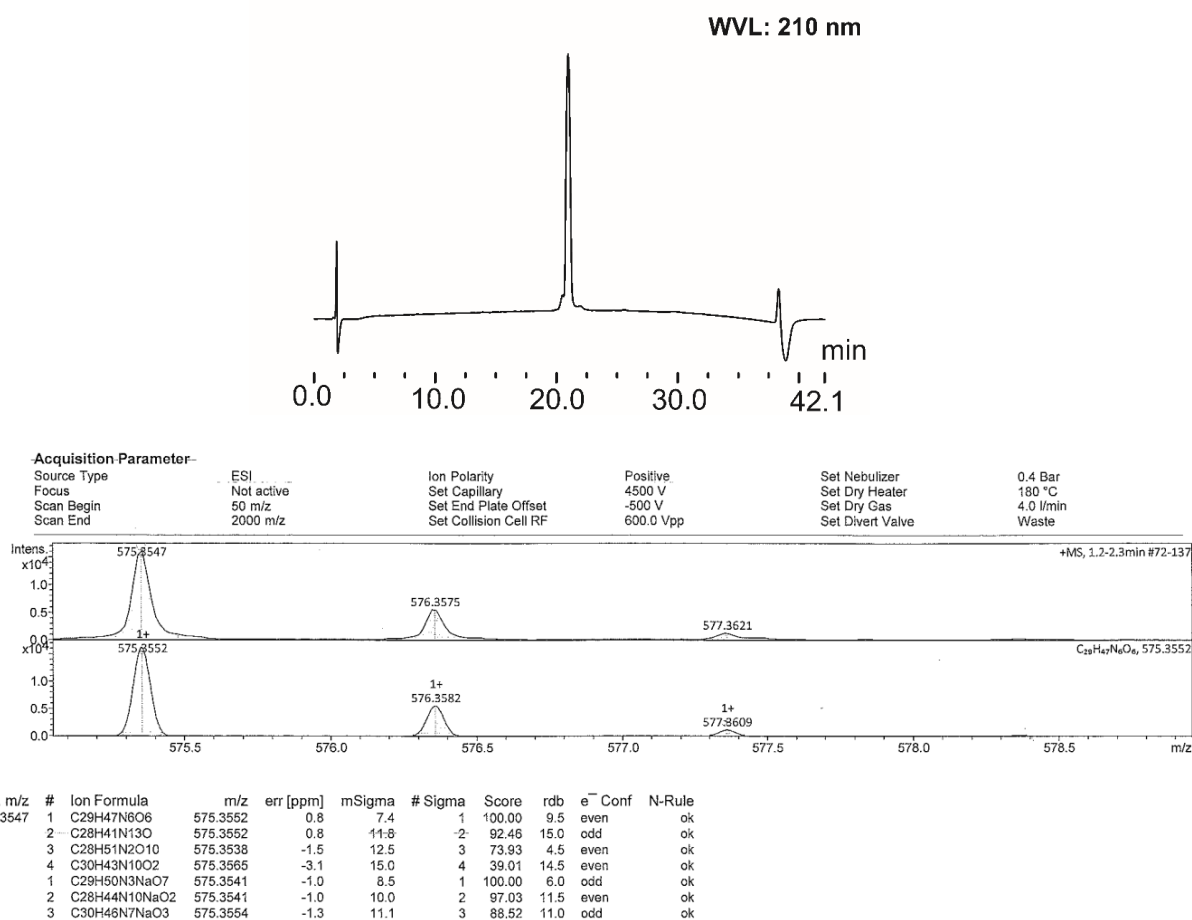

**Figure S11.** Analytical RP-HPLC and HR-MS data of peptide **23**.



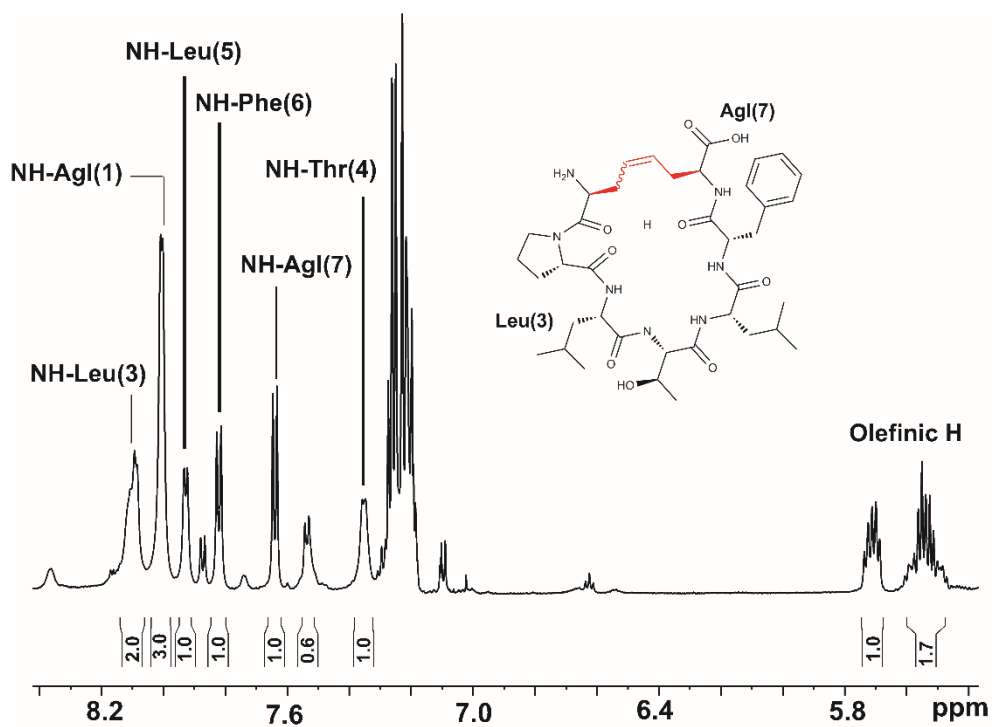

Figure S12. Partial  $^1\text{H}$  NMR spectrum of **7** in  $\text{DMSO-d}_6$  at 298K.

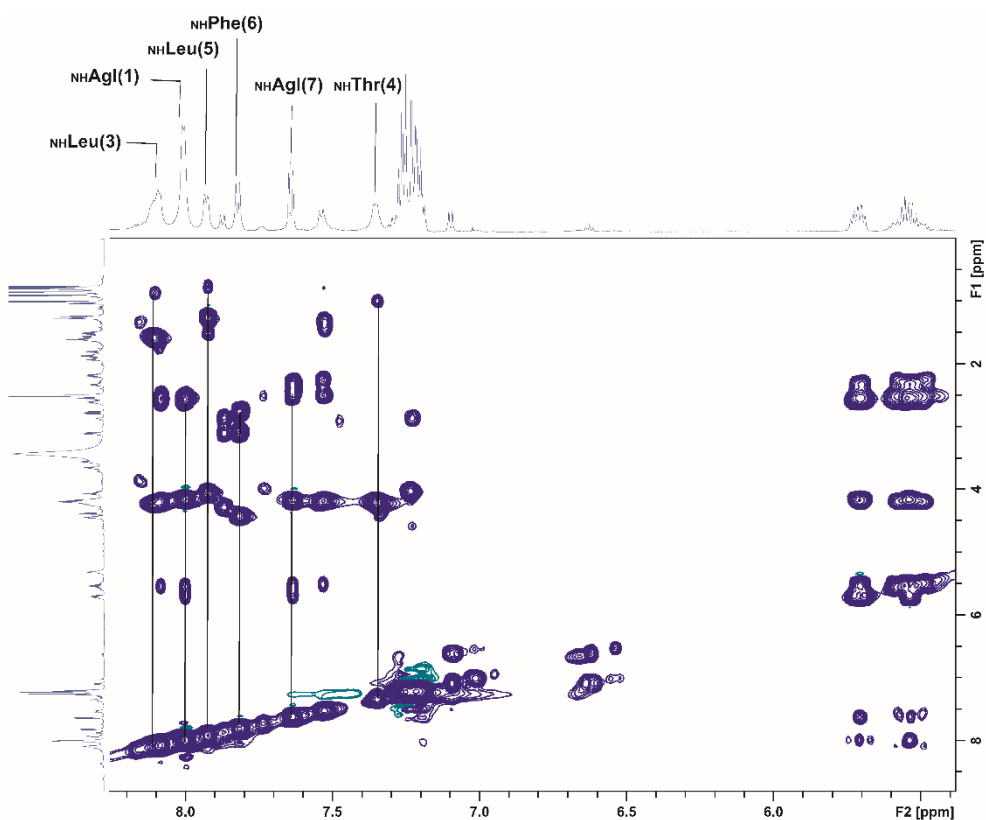

Figure S13. Partial 600 MHz TOCSY spectrum of **7** in  $\text{DMSO-d}_6$  at 298K.

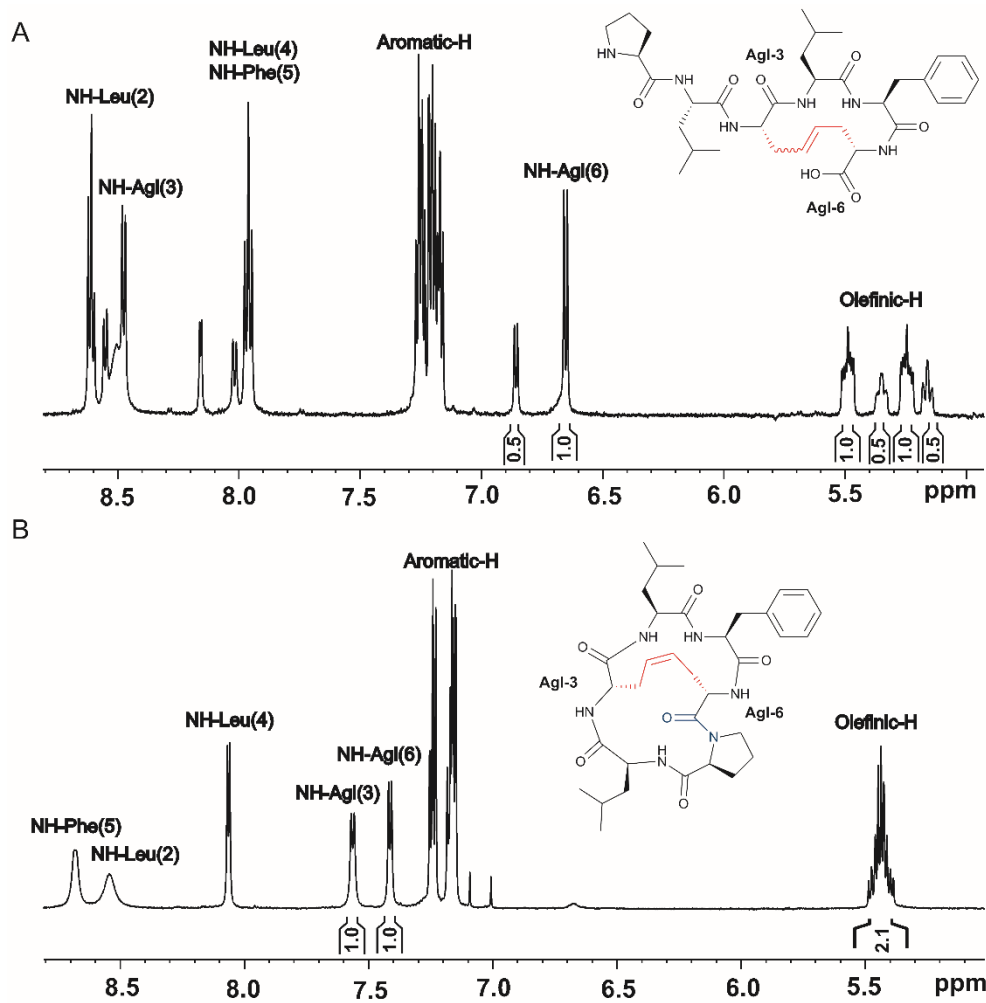

**Figure S14.** Amide and alkene regions of the  $^1\text{H}$  NMR spectra of (A) dicarba analogue **8** at 298 K with a 2:1 ratio of major:minor signals for the olefinic hydrogens, (B) bicyclic analogue **9** at 298 K showing the presence of only one diastereomer.

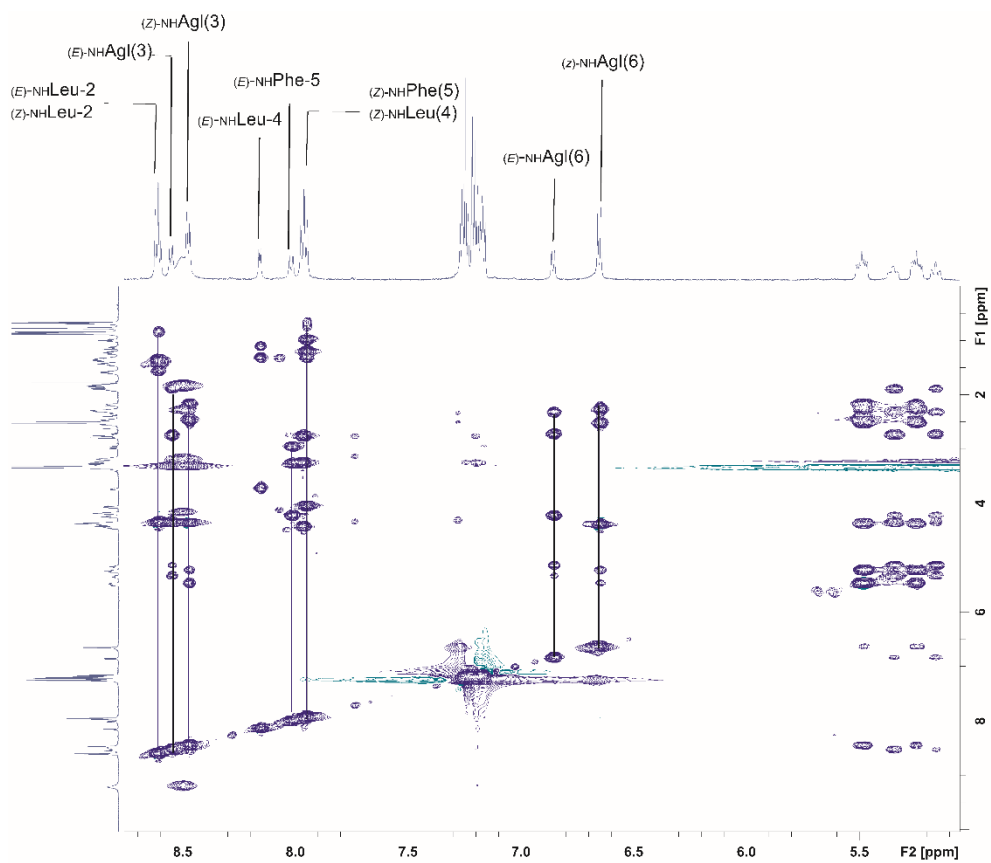

Figure S15. Partial 600 MHz TOCSY spectrum of **8** in DMSO-d<sub>6</sub> at 298K.

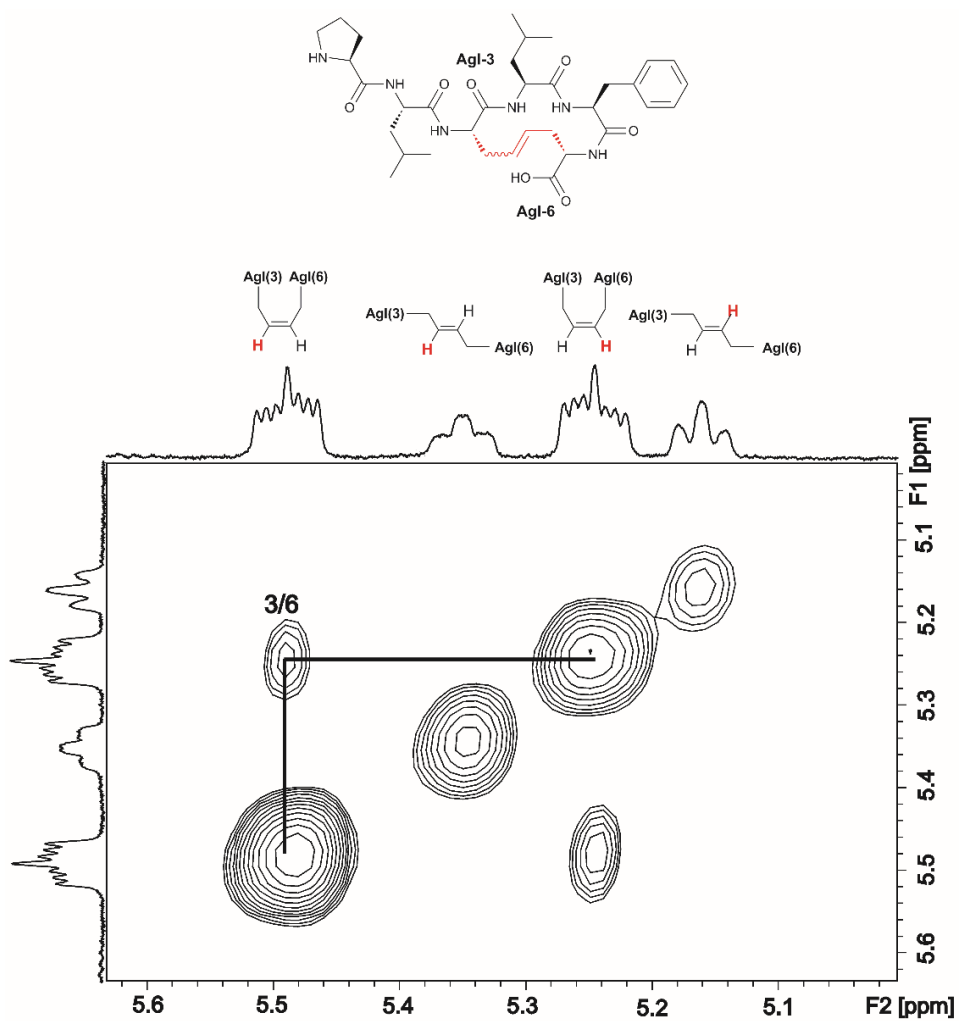

**Figure S16.** Selected 600 MHz NOESY spectra of the dicarba analogue **8** showing the olefinic-H connectivities with the *cis*-isomer exhibiting strong nOe.

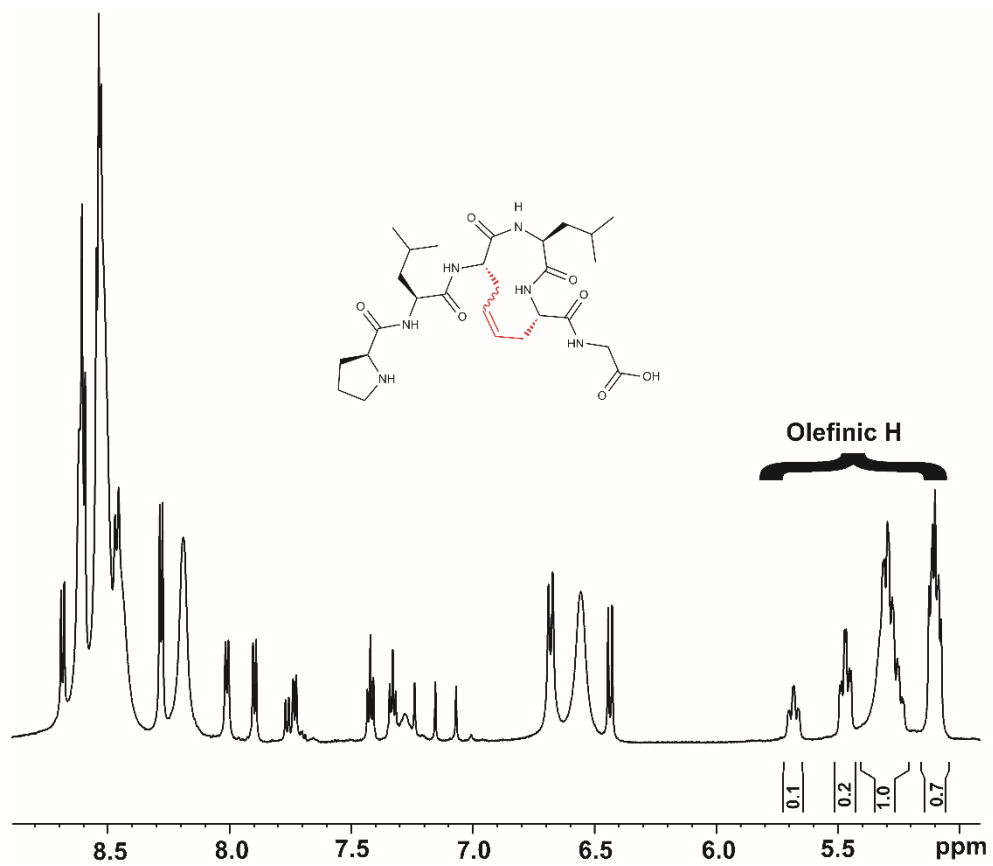

Figure S17. Partial  $^1\text{H}$  NMR spectrum of **10** in  $\text{DMSO-d}_6$  at 298K.

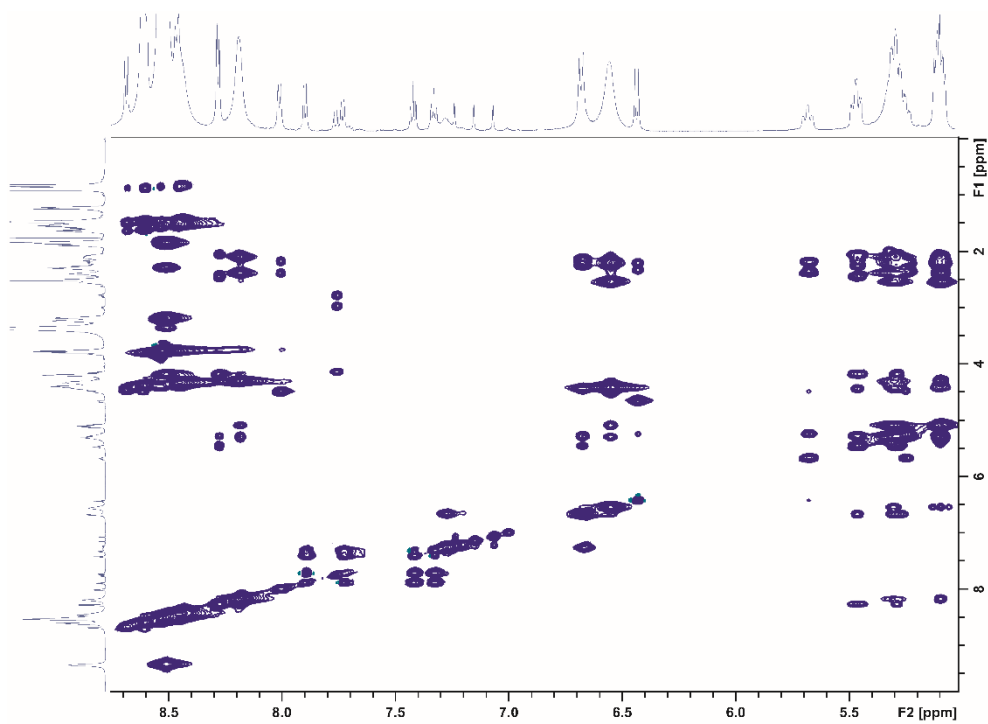

Figure S18. Partial 600 MHz TOCSY spectrum of **10** in  $\text{DMSO-d}_6$  at 298K.

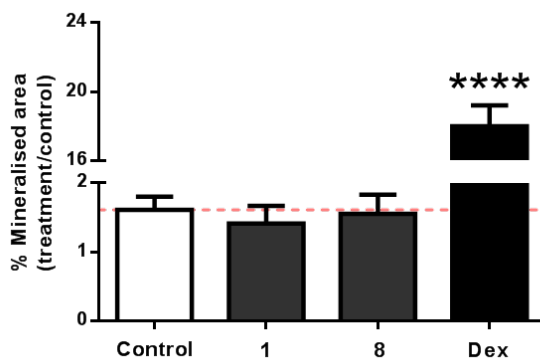

**Figure S19.** Effects of dianthin G (**1**) ( $10^{-8}$  M) and the dicarba analogue **8** ( $10^{-8}$  M) in primary human osteoblasts on cell differentiation, assessed by percentage of mineralisation. Data are expressed as a ratio of treatment to control, mean  $\pm$  SEM from a representative experiment. Dexamethasone [Dex] ( $10^{-8}$  M) is included as a positive control. \*\*\*\*significantly different from control ( $P < 0.0001$ ).

### Circular dichroism spectroscopy

All CD spectra were recorded using a Pi Star-180 (Applied Photophysics, Surrey, UK) spectrometer at 20 °C with a cell of 0.1 cm path length in the range from 190 nm to 300 nm at 0.5 nm intervals with a 5 s response time. Each CD spectrum measurement represents the average of four scans obtained with a 2 nm optical bandwidth. Baseline spectrum was collected with the solvent alone (30% TFE in water) and then subtracted from the raw peptide spectra. The measurements were performed at peptide concentrations of 86  $\mu$ M in 30% TFE in water, in 1 mm quartz cuvettes (Hellma Analytics, Mullheim, Germany). Data are expressed as mean residue ellipticities [ $\theta$ ] in ( $\text{deg cm}^2 \text{ dmol}^{-1}$ ), calculated as follows:

$$\theta = S / (10 \times c \times L \times n)$$

Where S is the raw CD signal in millidegrees, c is the peptide concentration (M), L is the cuvette path length (cm), and n is the number of peptide bonds.

### References

1. (a) P. W. R. Harris, D. J. Lee and M. A. Brimble, *J. Pept. Sci.*, 2012, **18**, 549-555; (b) Y. Chen, C. T. Mant and R. S. Hodges, *J. Chromatogr. A.*, 2007, **1140**, 112-120.
2. J. Cornish, K. E. Callon, C. Q.-X. Lin, C. L. Xiao, T. B. Mulvey, D. H. Coy, G. J. S. Cooper and I. R. Reid, *Am. J. Physiol.*, 1998, **274**, 827-833.
3. E. Kaiser, R. L. Colecott, C. D. Bossinger and P. I. Cook, *Anal. Biochem.*, 1970, **34**, 595-598.
4. H. Kaur, A. M. Heapy, R. Kowalczyk, Z. Amso, M. Watson, J. Cornish and M. A. Brimble, *Tetrahedron*, 2014, **70**, 7788-7794.
